# Supplementary material for: Ultra-small biocompatible jujube polysaccharide stabilized platinum nanoclusters for glucose detection
Source: Royal Society of Chemistry journal article supplement (doi:10.1039/c9an01053j), 2019-01-01
Supplement: c9an01053j1.pdf [file c9an01053j1.pdf]

## Supplementary Information

### Ultra-Small Biocompatible Jujube Polysaccharide Stabilized Platinum Nanoclusters for Glucose Detection

Xiaolei Guo,<sup>a,b</sup> Yixing Suo,<sup>c</sup> Xuan Zhang,<sup>b</sup> Yanshuai Cui,<sup>\*a</sup> Shengfu Chen,<sup>d</sup> Haotian Sun,<sup>d</sup> Dawei Gao,<sup>b</sup> Zhiwei Liu<sup>b</sup> and Longgang Wang<sup>\*a,b</sup>

<sup>a</sup> State Key Laboratory of Metastable Materials Science and Technology, Yanshan University, Qinhuangdao, 066004, China.

<sup>b</sup> Key Laboratory of Applied Chemistry, College of Environmental and Chemical Engineering, Yanshan University, Qinhuangdao, 066004, China.

<sup>c</sup> College of Chemistry, Nankai University, Tianjin, 300071, China.

<sup>d</sup> Key Laboratory of Biomass Chemical Engineering of Ministry of Education, College of Chemical and Biological Engineering, Zhejiang University, Hangzhou, 310027, China.

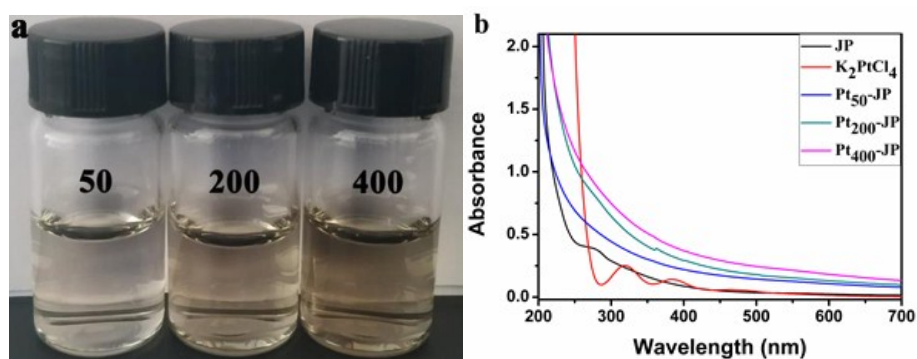

Fig. S1 (a) The photos of Pt<sub>n</sub>-JP solution and (b) UV-Vis spectra of Pt<sub>n</sub>-JP, JP and K<sub>2</sub>PtCl<sub>4</sub>.

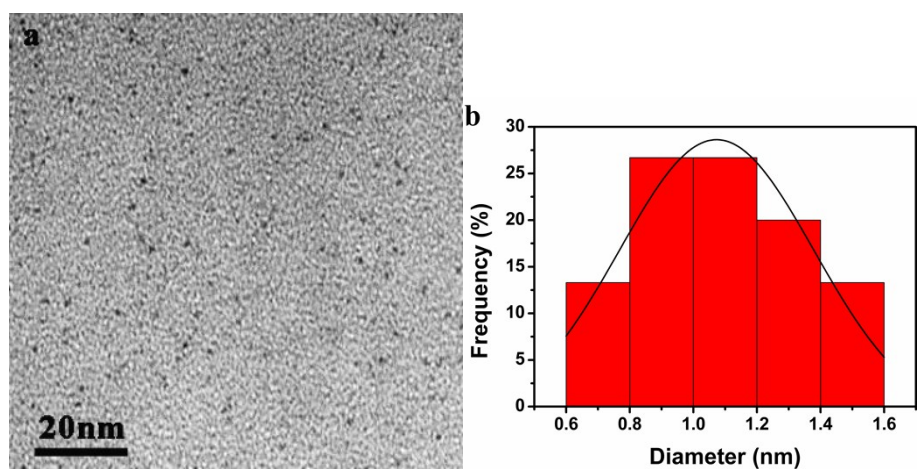

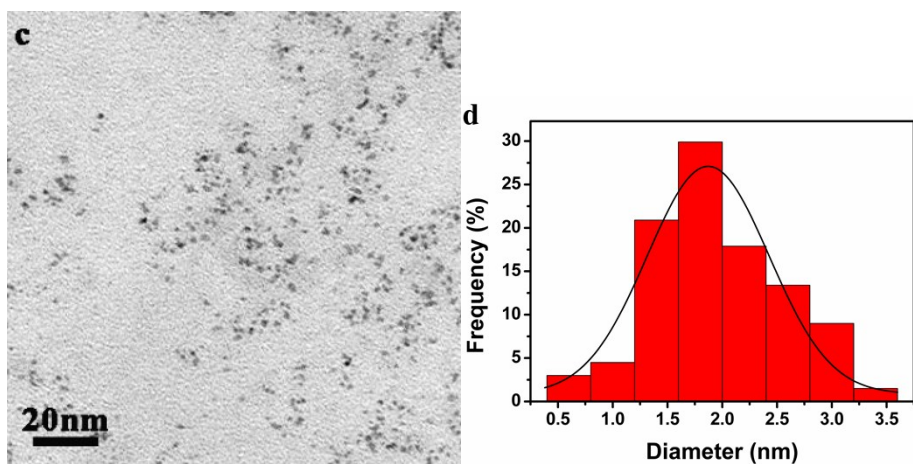

Fig. S2 TEM images and size distribution histograms of (a,b) Pt<sub>50</sub>-JP NCs and (c,d) Pt<sub>400</sub>-JP NCs.

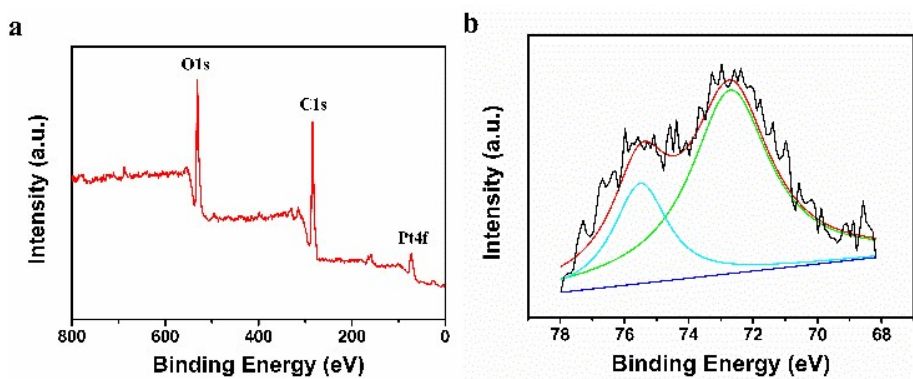

Fig. S3 (a) XPS spectrum of Pt<sub>200</sub>-JP NCs and (b) the binding energy of Pt4f.

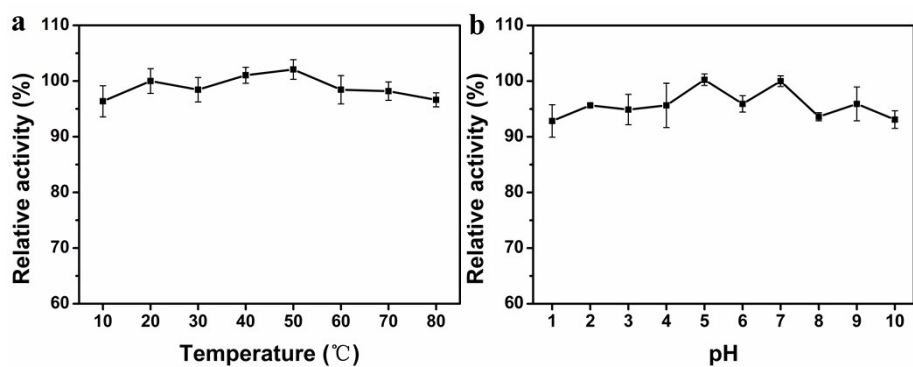

Fig. S4 The catalytic activity of Pt<sub>200</sub>-JP NCs after incubation at different (a) temperature and (b) pH for 24h.

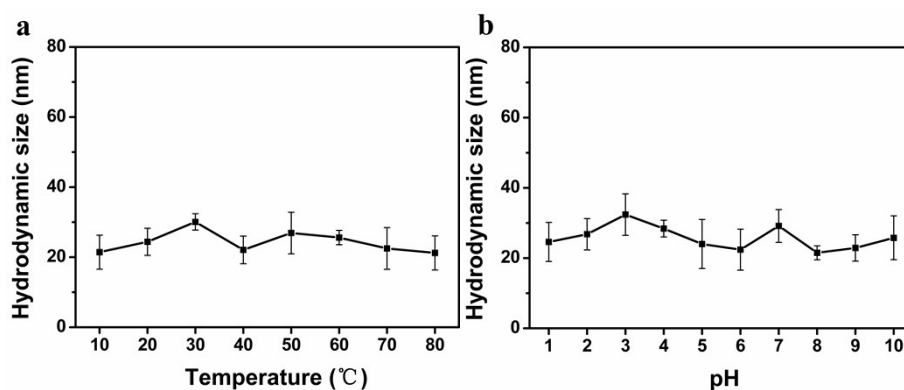

**Fig. S5** The hydrodynamic size of Pt<sub>200</sub>-JP NCs after incubation at different (a) temperature and (b) pH for 24h.

**Table S1.** Comparison of kinetic parameters of  $K_m$  and  $V_{max}$ .

| Catalyst              | Substrate                     | $K_m$ [mM] | $V_{max}$ [ $10^{-8}$ M s <sup>-1</sup> ] | Reference |
|-----------------------|-------------------------------|------------|-------------------------------------------|-----------|
| Pt <sub>200</sub> -JP | TMB                           | 0.719      | 51.33                                     | this work |
| Pt <sub>200</sub> -JP | H <sub>2</sub> O <sub>2</sub> | 9.344      | 12.49                                     | this work |
| Pt/PCN                | TMB                           | 1.056      | 23.12                                     | 1         |
| Pt/PCN                | H <sub>2</sub> O <sub>2</sub> | 7.362      | 25.20                                     | 1         |
| Pt NPs/GO             | TMB                           | 0.1864     | 10.02                                     | 2         |
| Pt NPs/GO             | H <sub>2</sub> O <sub>2</sub> | 221.4      | 12.45                                     | 2         |
| HRP                   | TMB                           | 0.434      | 10.00                                     | 3         |
| HRP                   | H <sub>2</sub> O <sub>2</sub> | 3.70       | 8.71                                      | 3         |

**Table S2.** Detection of the Content of Glucose in real samples

| Sample         | experimental<br>result (mM) | glucose       | RSD            | Sample          | experimental<br>result (mM) | RSD            | normal<br>range(mM)     |
|----------------|-----------------------------|---------------|----------------|-----------------|-----------------------------|----------------|-------------------------|
|                |                             | meter<br>(mM) | (n = 3)<br>(%) |                 |                             | (n = 3)<br>(%) |                         |
| Human<br>serum | 9.2                         | 9.1           | 1.10           | Human<br>saliva | 0.12                        | 2.74           | 0.008–0.21 <sup>4</sup> |
|                | 4.9                         | 5.1           | 3.14           |                 | 0.17                        | 1.35           |                         |
|                | 6.5                         | 6.3           | 2.37           |                 | 0.20                        | 3.29           |                         |

## References

- 1 W. Shi, H. Fan, S. Ai and L. Zhu, *Sens. Actuators, B*, 2015, **221**, 1515-1522.
- 2 L. N. Zhang, H. H. Deng, F. L. Lin, X. W. Xu, S. H. Weng, A. L. Liu, X. H. Lin, X. H. Xia and W. Chen, *Anal Chem*, 2014, **86**, 2711-2718.
- 3 L. Gao, J. Zhuang, L. Nie, J. Zhang, Y. Zhang, N. Gu, T. Wang, J. Feng, D. Yang, S. Perrett and X. Yan, *Nature Nanotech.*, 2007, **2**, 577-583.
- 4 Vinita, N. R. Nirala, M. Tiwari and R. Prakash, *Mikrochim. Acta*, 2018, **185**, 245.
